# Supplementary material for: The impact of the Ebola virus disease (EVD) epidemic on agricultural production and livelihoods in Liberia
Source: PubMed Central journal article supplement (PMC6071957; doi:10.1371/journal.pntd.0006580), 2018-08-02
Supplement: pntd.0006580.s001.pdf [file pntd.0006580.s001.pdf]

## Supporting information

### S1 Appendix: Additional statistical analysis and discussions

**Table A. The summary of methods used to analyze the data**

|                                                             | Analysis used                                       | Models                                         | R Package |
|-------------------------------------------------------------|-----------------------------------------------------|------------------------------------------------|-----------|
| <b>The effect of EVD on the livelihood outcome (part I)</b> |                                                     |                                                |           |
| Total household income                                      | Both descriptive statistics and regression analysis | Spatial-lagged models and spatial-error models | spdep     |
| Agricultural production                                     | Both descriptive statistics and regression analysis | Spatial stochastic production frontier model   | ssfa      |
| <b>The effect of EVD on Resource base (part II)</b>         |                                                     |                                                |           |
| Financial capital                                           | Descriptive statistics                              |                                                |           |
| Physical capital                                            | Descriptive statistics                              |                                                |           |
| Natural capital                                             | Descriptive statistics                              |                                                |           |
| Social capital                                              | Both descriptive statistics and regression analysis | Spatial-lagged models and                      | spdep     |

|  |  |                         |  |
|--|--|-------------------------|--|
|  |  | spatial-error<br>models |  |
|--|--|-------------------------|--|

**Table B: Descriptive statistics**

| Variable                               | Mean  | Std. Dev. | Min | Max |
|----------------------------------------|-------|-----------|-----|-----|
| Incidence of EVD in the community: Yes | 0.311 | 0.463     | 0   | 1   |
| Age of the respondent                  | 42.29 | 12.416    | 18  | 85  |
| Household size                         | 8.424 | 3.993     | 1   | 18  |
| Farm size (hectares)                   | 1.532 | 1.946     | 0   | 25  |
| Urban                                  | 0.42  | 0.491     | 0   | 1   |
| Gender                                 | 0.902 | 0.297     | 0   | 1   |
| Education level                        | 6.184 | 5.255     | 0   | 18  |

**Table C: Conversion factors for different categories of livestock**

|         |      |
|---------|------|
| Camels  | 1.00 |
| Cattle  | 0.70 |
| Sheep   | 0.10 |
| Goats   | 0.10 |
| Horses  | 0.80 |
| Mules   | 0.70 |
| Asses   | 0.50 |
| Pigs    | 0.20 |
| Chicken | 0.01 |

Source: Jahnke (1982)

**Table D: Significance test for spatial correlation of the residuals obtained from Mixed-effect models**

| Dependent variable            | Moran's I | SD     | p-value |
|-------------------------------|-----------|--------|---------|
| Community trust (Table 1)     | 0.1771    | 4.8965 | 0.000   |
| Institutional trust (Table 1) | 0.1297    | 3.5986 | 0.00016 |
| Total Income (Table 2)        | 0.087     | 2.4506 | 0.00713 |

**Table E: EVD and Social capital: Alternative models**

|                                            | Community Trust      |                                                |                     | Institutional Trust  |                                                |                     |
|--------------------------------------------|----------------------|------------------------------------------------|---------------------|----------------------|------------------------------------------------|---------------------|
|                                            | Model (1)            | Model (2)                                      | Model (3)           | Model (4)            | Model (5)                                      | Model (6)           |
|                                            | Linear mixed-effects | Linear model with Gaussian spatial correlation | Spatial error Model | Linear mixed-effects | Linear model with Gaussian spatial correlation | Spatial error Model |
| Incidence of Ebla in the community:<br>Yes | 0.0638               | 0.0401                                         | 0.0966              | -0.1989*             | -0.3646***                                     | -0.2781***          |
|                                            | (0.1142)             | (0.1114)                                       | (0.1121)            | (0.1152)             | (0.1084)                                       | (0.1029)            |
| Residence: Urban                           | 0.2880               | -0.1413                                        | -0.1778*            | -0.4709***           | -0.6268***                                     | -0.6158***          |
|                                            | (0.3606)             | (0.1069)                                       | (0.1061)            | (0.1332)             | (0.1038)                                       | (0.0945)            |
| Religion: Muslim                           | 0.0019               | 0.0125                                         | 0.0220              | -0.1081              | -0.1412                                        | -0.0888             |
|                                            | (0.1667)             | (0.1601)                                       | (0.1614)            | (0.1625)             | (0.1546)                                       | (0.1482)            |
| Religion: Other                            | 0.0175               | 0.0446                                         | -0.0368             | 0.1179               | 0.0302                                         | 0.1335              |

|                                 |           |            |           |            |            |            |
|---------------------------------|-----------|------------|-----------|------------|------------|------------|
|                                 | (0.2893)  | (0.2893)   | (0.2960)  | (0.2925)   | (0.2792)   | (0.2811)   |
| Religion: Christian (reference) |           |            |           |            |            |            |
| Ln (Total Income)               | 0.0064    | 0.0258     | 0.0215    | 0.0039     | 0.0030     | 0.0215     |
|                                 | (0.0196)  | (0.0193)   | (0.0194)  | (0.0197)   | (0.0186)   | (0.0178)   |
| Gender: Male                    | 0.5087**  | 0.4386***  | 0.4434*** | 0.0580     | 0.2507*    | 0.2128     |
|                                 | (0.2427)  | (0.1351)   | (0.1381)  | (0.1767)   | (0.1309)   | (0.1306)   |
| Education level (years)         | 0.0127    | 0.0042     | 0.0046    | -0.0245*** | -0.0282*** | -0.0308*** |
|                                 | (0.0079)  | (0.0078)   | (0.0081)  | (0.0080)   | (0.0076)   | (0.0078)   |
| Age                             | 0.0031    | 0.0003     | -0.0001   | 0.0032     | 0.0066**   | 0.0061**   |
|                                 | (0.0032)  | (0.0032)   | (0.0033)  | (0.0032)   | (0.0031)   | (0.0031)   |
| ac.term                         |           | -1.9025*** |           |            | -1.6651*** |            |
|                                 |           | (0.2071)   |           |            | (0.1874)   |            |
| Constant                        | -1.0808** | -0.4444    | -0.4217   | 0.1764     | -0.1147    | -0.2683    |
|                                 | (0.4821)  | (0.3030)   | (0.2996)  | (0.4192)   | (0.2926)   | (0.2678)   |
| N                               | 553       | 553        | 553       | 553        | 553        | 553        |
| R2                              |           | 0.3272     |           |            | 0.3982     |            |
| Adjusted R2                     |           | 0.2359     |           |            | 0.3165     |            |

|                                |            |           |            |            |           |            |
|--------------------------------|------------|-----------|------------|------------|-----------|------------|
| Log Likelihood                 | -712.3715  |           | -704.0825  | -708.3407  |           | -671.7219  |
| Akaike Inf. Crit.              | 1,570.7430 |           | 1,544.1650 | 1,562.6810 |           | 1,479.4440 |
| Bayesian Inf. Crit.            | 1,885.7640 |           |            | 1,877.7030 |           |            |
| Residual Std. Error (df = 486) |            | 0.8535    |            |            | 0.8241    |            |
| F Statistic (df = 66; 486)     |            | 3.5815*** |            |            | 4.8731*** |            |
| Wald Test (df = 1)             |            |           | 3.9353**   |            |           | 33.3193*** |
| LR Test (df = 1)               |            |           | 3.0557*    |            |           | 23.8147*** |

Note: \*p<0.1; \*\*p<0.05; \*\*\*p<0.01

**Table F: EVD and Institutional trust: Additive index**

|                                    | Dependent variable: Institutional trust |                                 |                              |
|------------------------------------|-----------------------------------------|---------------------------------|------------------------------|
|                                    | Model (1)<br>Complete<br>sample         | Model (2)<br>Rural<br>subsample | Model (3)<br>Urban subsample |
| Incidence of EVD in the community: | -0.0389**                               | -0.0073                         | -0.0705***                   |
| Yes                                | (0.0187)                                | (0.0317)                        | (0.0233)                     |
| Residence: Urban                   | -0.1090***                              |                                 |                              |
|                                    | (0.0180)                                |                                 |                              |

|                                 |            |            |           |
|---------------------------------|------------|------------|-----------|
| Religion: Muslim                | -0.0128    | 0.0320     | -0.0332   |
|                                 | (0.0269)   | (0.0348)   | (0.0380)  |
| Religion: Other                 | -0.0138    | 0.0472     | -0.0184   |
|                                 | (0.0485)   | (0.1174)   | (0.0557)  |
| Religion: Christian (reference) |            |            |           |
| Ln (Total Income)               | 0.0016     | 0.0055     | -0.0048   |
|                                 | (0.0032)   | (0.0042)   | (0.0045)  |
| Gender: Male                    | 0.0366     | 0.0673*    | 0.0230    |
|                                 | (0.0227)   | (0.0344)   | (0.0289)  |
| Education level (years)         | -0.0041*** | -0.0026    | -0.0032*  |
|                                 | (0.0013)   | (0.0018)   | (0.0017)  |
| Age                             | 0.0009*    | 0.0021***  | 0.0005    |
|                                 | (0.0005)   | (0.0007)   | (0.0007)  |
| Constant                        | 0.9701***  | 0.9627***  | 1.0154*** |
|                                 | (0.0731)   | (0.1046)   | (0.0891)  |
| Observations                    | 553        | 210        | 343       |
| Log Likelihood                  | 288.3293   | 168.0857   | 160.0758  |
| sigma2                          | 0.0205     | 0.0115     | 0.0227    |
| Akaike Inf. Crit.               | -440.6586  | -230.1714  | -222.1517 |
| Wald Test (df = 1)              | 6.1287**   | 10.7684*** | 9.1232*** |
| LR Test (df = 1)                | 6.0281**   | 10.1279*** | 8.0619*** |

Note: \*p<0.1; \*\*p<0.05; \*\*\*p<0.01

**Table G: EVD and total household income: Alternative models**

| <b>Dependent variable: Logarithm of annual household Income</b> |                                      |                                                                     |                              |
|-----------------------------------------------------------------|--------------------------------------|---------------------------------------------------------------------|------------------------------|
|                                                                 | Model 1:<br>Linear mixed-<br>effects | Model 2:<br>Linear model<br>with Gaussian<br>spatial<br>correlation | Model 3:<br>Spatial<br>error |
| Incidence of Ebola in the<br>community: Yes                     | 0.0658<br>(0.1210)                   | 0.1036<br>(0.1136)                                                  | 0.0994<br>(0.1211)           |
| Farm size                                                       | 0.0601**<br>(0.0297)                 | 0.0402<br>(0.0293)                                                  | 0.0405<br>(0.0294)           |
| Residence: Urban                                                | -0.0646<br>(0.1224)                  | -0.1595<br>(0.1072)                                                 | -0.1589<br>(0.1169)          |
| Household size                                                  | 0.0045<br>(0.0123)                   | 0.0055<br>(0.0124)                                                  | 0.0052<br>(0.0124)           |
| Gender: Male                                                    | 0.5912***<br>(0.1839)                | 0.5755**<br>*<br>(0.1678)                                           | 0.5626***<br>(0.1674)        |
| Age (years)                                                     | -0.0052                              | -0.0043                                                             | -0.0047                      |



|                                           |            |           |            |
|-------------------------------------------|------------|-----------|------------|
|                                           | (0.0040)   | (0.0041)  | (0.0040)   |
| Education level (years)                   | 0.0228**   | 0.0230**  | 0.0225**   |
|                                           | (0.0100)   | (0.0100)  | (0.0099)   |
| Occupation: Farmer                        | -0.5437*** | -         | -0.5426*** |
|                                           | (0.1731)   | 0.5492*** | (0.1725)   |
| Occupation: Wage employment               | 0.3419*    | 0.3256*   | 0.3345*    |
|                                           | (0.1916)   | (0.1927)  | (0.1891)   |
| Occupation: Informal<br>employment        | 0.1202     | 0.1113    | 0.1166     |
|                                           | (0.2503)   | (0.2458)  | (0.2476)   |
| Occupation: skilled labor                 | 0.0687     | 0.1324    | 0.1835     |
|                                           | (0.2701)   | (0.2723)  | (0.2687)   |
| Occupation: Small business                | -0.5139**  | -         | -0.4503**  |
|                                           | (0.2114)   | 0.4722**  | (0.2118)   |
| Occupation: Others (reference)<br>ac.term | NA         | NA        | NA         |
|                                           |            | 0.4432**  |            |
|                                           |            | *         |            |
| Constant                                  | 10.9423*** | (0.0866)  | 10.9955*** |
|                                           | (0.3135)   | 10.9679** | (0.2998)   |
|                                           |            | *         |            |

|                     |                             |                           |                     |
|---------------------|-----------------------------|---------------------------|---------------------|
| Observations        | 528                         | 528                       | 528                 |
| R2                  |                             | 0.2104                    |                     |
| Adjusted R2         |                             | 0.1904                    |                     |
| Log Likelihood      | -813.1591                   |                           | -793.7262           |
| sigma2              |                             |                           | 1.1688              |
| Akaike Inf. Crit.   | 1,666.3180                  |                           | 1,617.4520          |
| Bayesian Inf. Crit. | 1,751.7000                  |                           |                     |
| Residual Std. Error |                             | 1.0910 (df = 514)         |                     |
| F Statistic         |                             | 10.5328*** (df = 13; 514) |                     |
| Wald Test           |                             |                           | 17.0610*** (df = 1) |
| LR Test             |                             |                           | 14.9260*** (df = 1) |
| Note:               | *p<0.1; **p<0.05; ***p<0.01 |                           |                     |

**Table H: Determinants of agricultural production (spatial stochastic frontier model vs OLS)**

| Dependent variable: Ln (Value of crop production at gross margin per hectare) |                      |                                    |
|-------------------------------------------------------------------------------|----------------------|------------------------------------|
|                                                                               | SSFA Model           | Ordinary Least squares (OLS) model |
| Incidence of EVD in the community: Yes                                        | -0.534***<br>(0.188) | -0.5447***<br>(0.1855)             |
| Ln (Farm size)                                                                | 0.595***<br>(0.085)  | 0.3962***<br>(0.0857)              |
| Ln (Labor cost)                                                               | 0.084***<br>(0.023)  | 0.0701***<br>(0.0236)              |

---

|                                        |           |           |
|----------------------------------------|-----------|-----------|
| Ln (Number of male adult)              | 0.096     | 0.1196    |
|                                        | (0.125)   | (0.1315)  |
| Ln (Number of female adult)            | -0.305**  | -0.3495** |
|                                        | (0.149)   | (0.1528)  |
| Ln (Education level of household head) | 0.033     | 0.0450    |
|                                        | (0.066)   | (0.0680)  |
| Ln (Age of household head)             | 0.0199    | 0.1485    |
|                                        | (0.257)   | (0.2748)  |
| Household head gender: Male            | 0.306     | 0.3006    |
|                                        | (0.295)   | (0.3009)  |
| Constant                               | 9.806***  | 8.5480*** |
|                                        | (1.111)   | (1.0966)  |
| N                                      | 311       | 311       |
| $\sigma_u^2$ _dmu                      | 0.858     | n.a       |
|                                        | (0.841)   |           |
| $\sigma_v^2$                           | 1.0833*** | n.a       |
|                                        | (0.315)   |           |
| $\sigma^2$                             | 1.228     | n.a       |
| $\lambda$                              | 0.5334    | n.a       |
| Moran I statistic                      | -0.0613   | n.a       |
| Mean efficiency                        | 0.574     | n.a       |
| Spatial parameter, $\rho$              | 0.008     | n.a       |

---

---

|             |                |                       |
|-------------|----------------|-----------------------|
| LR-Test     | 7.812; p=0.003 | n.a                   |
| R2          | n.a            | 0.1534                |
| F Statistic | n.a            | 6.7948***(df= 8; 300) |

---

Note: Standard errors in parenthesis; \*p<0.1; \*\*p<0.05; \*\*\*p<0.01.
