# Supplementary material for: The impact of the Ebola virus disease (EVD) epidemic on agricultural production and livelihoods in Liberia
Source: PubMed Central journal article supplement (PMC6071957; doi:10.1371/journal.pntd.0006580), 2018-08-02
Supplement: pntd.0006580.s002.pdf [file pntd.0006580.s002.pdf]

## S2 Appendix: Social capital related questions in the questionnaire

How much do you agree with the following statements?

| Statement:                                                              | Strongly agree | Agree | Neutral | Disagree | Strongly disagree |
|-------------------------------------------------------------------------|----------------|-------|---------|----------|-------------------|
| Most of the people in my community are trustworthy                      |                |       |         |          |                   |
| Most of the people in my community are willing to help if needed        |                |       |         |          |                   |
| Most of the people in my tribe are trustworthy                          |                |       |         |          |                   |
| Most of the people who belong to the same religion as I are trustworthy |                |       |         |          |                   |
| The government of Liberia is trustworthy                                |                |       |         |          |                   |
| The head of my community is trustworthy                                 |                |       |         |          |                   |
